# Supplementary material for: Antimony Selenide Solar Cells Fabricated by Hybrid Reactive Magnetron Sputtering
Source: MDPI journal article supplement (doi:10.3390/nano13152257), 2023-08-05
Supplement: s1 [file s1]

# Supplementary Information

## **Antimony selenide solar cells fabricated by hybrid reactive magnetron sputtering**

Daniel Brito<sup>1,2</sup>, Pedro Anacleto<sup>1</sup>, Ana Pérez-Rodríguez<sup>1,3</sup>, Jose Fonseca<sup>1</sup>, Pedro Santos<sup>1</sup>, Marina Alves<sup>1,4</sup>, Alessandro Cavalli<sup>1</sup>, Deepanjan Sharma<sup>1</sup>, Marcel Claro<sup>1</sup>, Nicoleta Nicoara<sup>1</sup> and Sascha Sadewasser<sup>1\*</sup>

<sup>1</sup> International Iberian Nanotechnology Laboratory, Av. Mestre Jose Veiga, Braga 4715-330, Portugal

<sup>2</sup> Departamento de Física e Astronomia, Faculdade de Ciências, Universidade do Porto, Rua do Campo Alegre s/n, 4169-007, Porto, Portugal

<sup>3</sup> Nanotechnology Group, Department of Fundamental Physics, University of Salamanca 37008, Salamanca, Spain

<sup>4</sup> Centre of Physics of Minho and Porto Universities (CF-UM-UP), Azurém Campus, Guimaraes ~ 4800-058, Portugal

\*corresponding author: [Sascha.sadewasser@inl.int](mailto:Sascha.sadewasser@inl.int)

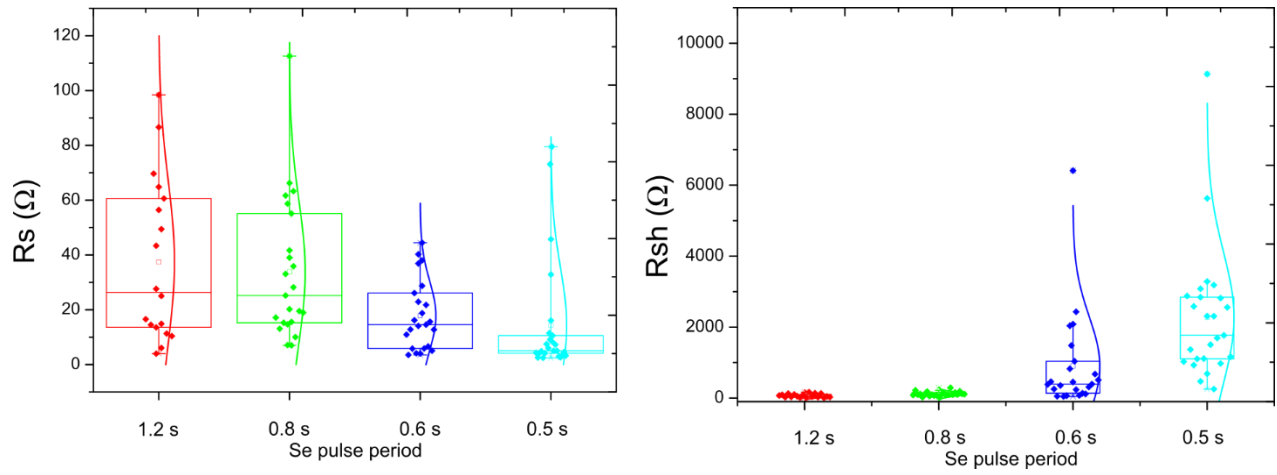

**Figure S1:** Box plot presenting the influence of the different Se pulse evaporation on series resistance and shunt resistance of  $\text{Sb}_2\text{Se}_3$  solar cells. All solar cells were deposited at a temperature of 270 °C.

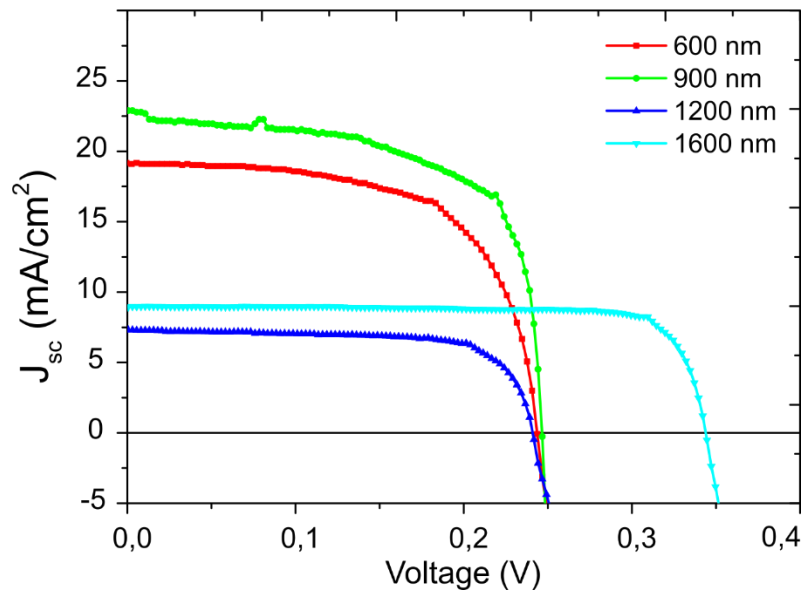

**Figure S2:** J-V curves of devices with the  $\text{Sb}_2\text{Se}_3$  absorbers deposited at 270°C with Se pulse period 0.5s for different  $\text{Sb}_2\text{Se}_3$  thicknesses.

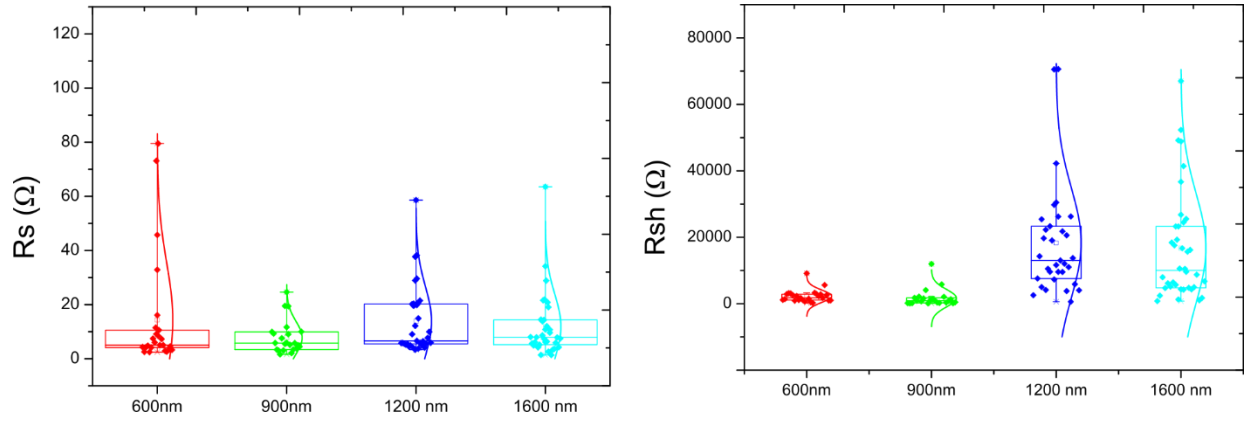

**Figure S3:** Box plot presenting the influence of the  $\text{Sb}_2\text{Se}_3$  thickness on series resistance and shunt resistance of  $\text{Sb}_2\text{Se}_3$  solar cells. All solar cells were deposited at a temperature of 270 °C.

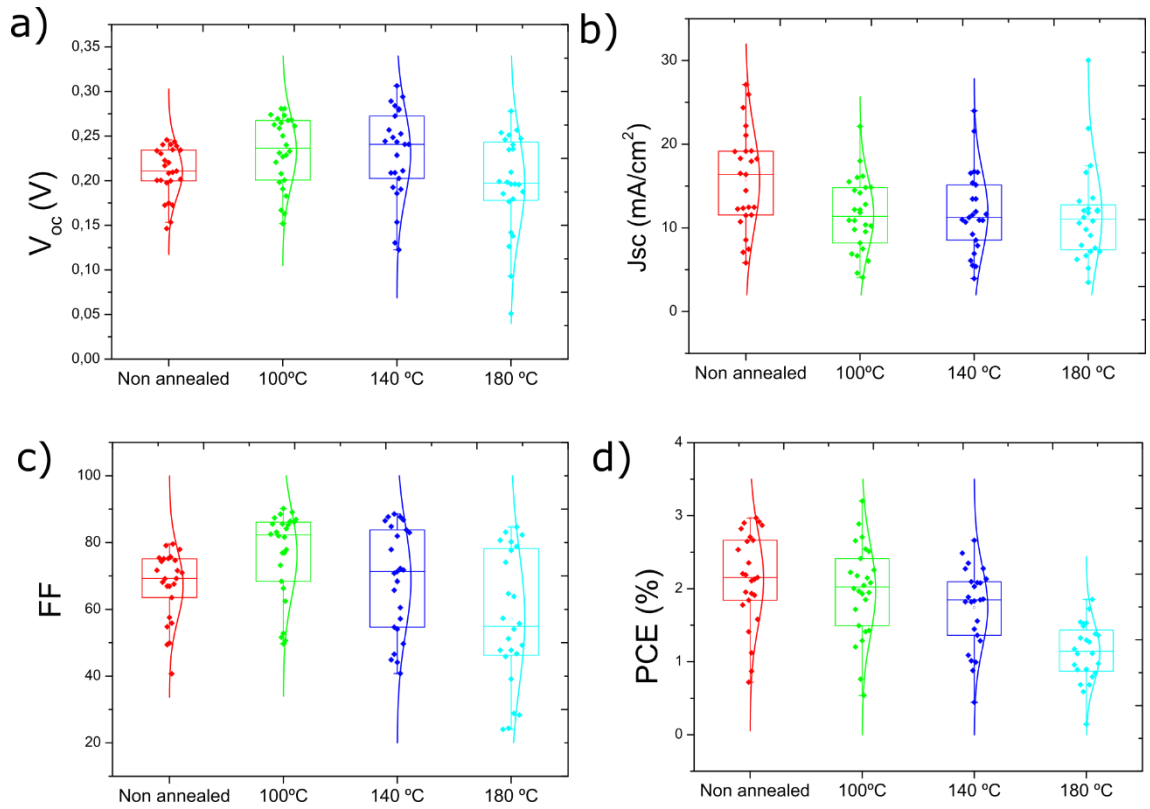

**Figure S4:** Box plots presenting the influence of annealing on the solar cell device parameters (a)  $V_{oc}$ , (b) short-circuit current density ( $J_{sc}$ ), (c) fill factor (FF), and (d) power conversion efficiency (PCE) for  $\text{Sb}_2\text{Se}_3$  solar cells with an absorber thickness of 600 nm deposited at 270 °C with Se pulse period of 0.5 s.

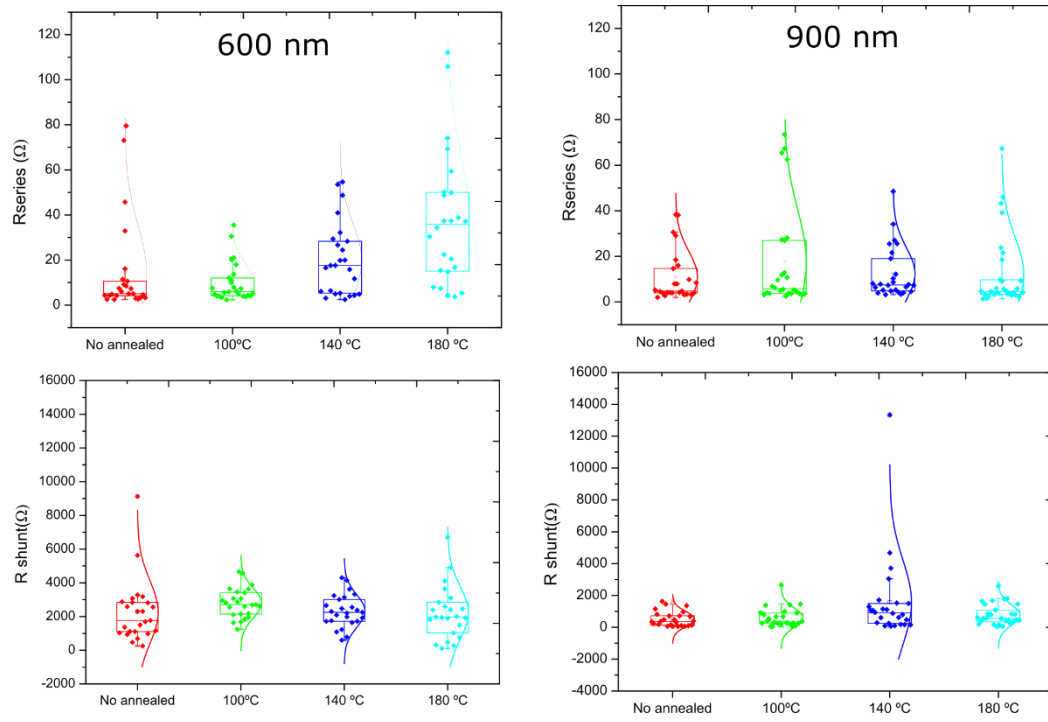

**Figure S5:** Box plot presenting the influence of the  $Sb_2Se_3$  solar cell annealing on series resistance and shunt resistance of  $Sb_2Se_3$  solar cells. All solar cells were deposited at a temperature of 270 °C.
